# Supplementary material for: Development of Phaleria macrocarpa (Scheff.) Boerl Fruits Using Response Surface Methodology Focused on Phenolics, Flavonoids and Antioxidant Properties
Source: MDPI journal article supplement (doi:10.3390/molecules23040724), 2018-03-22
Supplement: s1 [file s1]

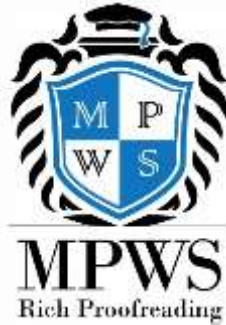

# **CERTIFICATE OF PROOFREADING**

THIS IS TO ACKNOWLEDGE THAT THE JOURNAL PAPER ENTITLED

**DEVELOPMENT OF PHALERIA MACROCARPA (SCHEFF.) BOERL  
FRUITS USING RESPONSE SURFACE METHODOLOGY ON  
PHENOLIC, FLAVONOID AND ANTIOXIDANTS**

WRITTEN BY

**KHURUL AIN**

HAS BEEN EDITED AND RETURNED TO THE CUSTOMER ON

**29<sup>TH</sup> JANUARY 2018**

.....  
**INTAN RAIHANA HUSIN**

Chief Executive Officer  
MPWS RICH RESOURCES SDN BHD
